# Supplementary material for: Multiscale cardiac imaging spanning the whole heart and its internal cellular architecture in a small animal model
Source: eLife. 2020 Oct 20;9:e58138. doi: 10.7554/eLife.58138 (PMC7595733; doi:10.7554/eLife.58138)
Supplement: Figure 8—source data 1. [file elife-58138-fig8-data1.xlsx]

## Sheet: Extracellular Space
From Selected Slices Segmentation							From Volumetric Analysis
SHAM A			TOF A				SHAM A			TOF A				SHAM A	TOF A
Processed SHAM A ROI2	% Extracellular (% of Total Volume)		Processed TOF A ROI2	% Extracellular (% of Total Volume)			Subsection	Extracellular Volume (% of Subsection Volume)		Subsection	Extracellular Volume (% of Subsection Volume)		Total Extracellular Volume (% of total volume)	0.0773869	0.122842
1	0.0487781		1	0.0977548			I	0.0515736		I	0.068646
50	0.0529505		50	0.107193			II	0.0542524		II	0.169752
100	0.113153		100	0.102424			III	0.0399857		III	0.0674597
150	0.0800715		150	0.107888			IV	0.0632014		IV	0.0906243
200	0.0686469		200	0.0921915			V	0.0815951		V	0.148833
250	0.0708325		250	0.0794755			VI	0.1666		VI	0.0759175
300	0.0786807		300	0.0722233			VII	0.0695928		VII	0.10599
350	0.0865289		350	0.0815617			VIII	0.0922719		VIII	0.137755
400	0.0759984		400	0.0962647
450	0.081661		450	0.104113
500	0.0593086		500	0.117028
550	0.0650705		550	0.139479
600	0.0552354		600	0.124478
650	0.0641764		650	0.121399
700	0.0659646		700	0.124578
750	0.0503676		750	0.118021
800	0.030002		800	0.125969
Average	0.0674957			0.106591				0.0773841			0.108122
Std Dev	0.0185627			0.0185741				0.0397503			0.0394485
Statistics: SHAM A vs TOF A
F-test	0.998081							0.984476
T-test, 1 tail, paired	5.40776e-05							0.0894604
SHAM B			TOF B
SHAM B ROI 2	% Extracellular (% of Total Volume)		TOF B ROI 2	% Extracellular (% of Total Volume)
Slice 1	0.0937314		Slice 1	0.21668
Slice 50	0.0874429		Slice 50	0.225214
Slice 100	0.143811		Slice 100	0.256328
Slice 150	0.137493		Slice 150	0.277767
Slice 200	0.156467		Slice 200	0.36061
Slice 250	0.147228		Slice 250	0.416044
Slice 300	0.153686		Slice 300	0.460958
Slice 350	0.167296		Slice 350	0.509656
Slice 400	0.222233		Slice 400	0.526207
Slice 450	0.284621		Slice 450	0.589052
Slice 500	0.287403		Slice 500	0.606567
Slice 550	0.25144		Slice 550	0.615241
Slice 600	0.268031		Slice 600	0.594119
Slice 650	0.214981		Slice 650	0.540165
Slice 700	0.208623		Slice 700	0.426108
Slice 750	0.192033		Slice 750	0.332165
Slice 800	0.18488		Slice 800	0.288953
Slice 850	0.210113		Slice 850	0.233298
Slice 900	0.218558		Slice 900	0.205305
Slice 950	0.216869		Slice 950	0.205822
Slice 1000	0.226902		Slice 1000	0.201172
Average	0.193993			0.385116
Std Dev	0.0560258			0.153489
Statistics: SHAM B vs TOF B
F-test	3.38614e-05
T-test, 1 tail, paired	7.05784e-07
Statistics: SHAM A vs SHAM B			Statistics: TOF A vs TOF B
F-test	4.50061e-05		F-test	1.43187e-11
T-test, 1 tail, equal variance	6.31137e-11		T-test, 1 tail, equal variance	4.66848e-09

## Sheet: Nuclei
From Selected Slices Segmentation							From Volumetric Analysis
SHAM A			TOF A				SHAM A			TOF A
Processed SHAM A ROI2	% Nuclei (% of Cell Volume)		Processed TOF A ROI2	% Nuclei (% of Cell Volume)			Subsection	Nuclei Volume (% of Cell Volume)		Subsection	Nuclei Volume (% of Cell Volume)
1	0.157105		1	0.136278			I	0.113858		I	0.0825751
50	0.157628		50	0.0933868			II	0.133224		II	0.109474
100	0.166931		100	0.0730736			III	0.116466		III	0.114792
150	0.12179		150	0.104155			IV	0.143489		IV	0.10467
200	0.111665		200	0.142634			V	0.113082		V	0.157606
250	0.096912		250	0.119557			VI	0.0860143		VI	0.132214
300	0.087086		300	0.103156			VII	0.132131		VII	0.0965773
350	0.0963759		350	0.13934			VIII	0.137155		VIII	0.101495
400	0.113272		400	0.0900529
450	0.12131		450	0.0909242
500	0.143476		500	0.113001
550	0.137577		550	0.0997286
600	0.123921		600	0.0879589
650	0.103787		650	0.130986
700	0.100671		700	0.156331
750	0.114923		750	0.122388
800	0.130582		800	0.113297
Average	0.122648			0.11272				0.121928			0.112425
Std Dev	0.0234785			0.0229344				0.0184835			0.0232041
Statistics: SHAM A vs TOF A
F-test	0.926442							0.563022
T-test, 1 tail, paired	0.157406							0.238774
SHAM B			TOF B
SHAM B ROI 2	% Nuclei (% of Cell Volume)		TOF B ROI 2	% Nuclei (% of Cell Volume)
Slice 1	0.118937		Slice 1	0.106178
Slice 50	0.112238		Slice 50	0.126478
Slice 100	0.119396		Slice 100	0.115793
Slice 150	0.108731		Slice 150	0.117744
Slice 200	0.10729		Slice 200	0.126319
Slice 250	0.114632		Slice 250	0.140845
Slice 300	0.171029		Slice 300	0.0881128
Slice 350	0.104868		Slice 350	0.0785891
Slice 400	0.0825137		Slice 400	0.0739118
Slice 450	0.0947091		Slice 450	0.0667215
Slice 500	0.105256		Slice 500	0.105674
Slice 550	0.164433		Slice 550	0.14361
Slice 600	0.126493		Slice 600	0.130605
Slice 650	0.0978233		Slice 650	0.0890531
Slice 700	0.108461		Slice 700	0.0867089
Slice 750	0.102299		Slice 750	0.0924517
Slice 800	0.0711761		Slice 800	0.100162
Slice 850	0.0782292		Slice 850	0.128097
Slice 900	0.114162		Slice 900	0.141611
Slice 950	0.127363		Slice 950	0.104839
Slice 1000	0.100745		Slice 1000	0.104228
Average	0.11099			0.107987
Std Dev	0.0237821			0.0229117
Statistics: SHAM B vs TOF B
F-test	0.869223
T-test, 1 tail, paired	0.312923
Statistics: SHAM A vs SHAM B			Statistics: TOF A vs TOF B
F-test	0.97153		F-test	0.98259
T-test, 1 tail, equal variance	0.0697516		T-test, 1 tail, equal variance	0.265388

## Sheet: Myofibrils
From Cropped Segmentations
SHAM A			TOF A
SHAM A Slice	% Myofibrils (% of Cellular Volume)		TOF A Slice	% Myofibrils (% of Cellular Volume)
1	0.26889		1	0.342282
50	0.245459		50
100	0.322034		100	0.345309
150	0.272668		150	0.266955
200	0.313913		200	0.266642
250	0.306195		250	0.318027
300	0.292171		300	0.252058
350	0.346021		350	0.271814
400	0.260119		400	0.275275
450	0.322496		450	0.25614
500			500	0.221698
550			550	0.399155
600			600
650			650
700			700
750			750
800			800
Average	0.294997			0.292305
Std Dev	0.0323735			0.0522587
Statistics: SHAM A vs TOF A
F-test	0.165211
T-test, 1 tail, paired	0.445032
SHAM B			TOF B
SHAM B Slice	% Myofibrils (% of Cellular Volume)		TOF B Slice	% Myofibrils (% of Cellular Volume)
1	0.309359		1	0.393803
50	0.233406		50
100			100	0.308057
150	0.246489		150	0.491014
200			200	0.29379
250	0.255587		250	0.161954
300			300	0.312955
350			350	0.255738
400			400	0.180189
450	0.360759		450	0.302826
500	0.378531		500
550			550
600			600
650	0.310547		650
700	0.306422		700
750	0.254866		750
800	0.279192		800
850			850	0.283225
900			900
950			950
1000			1000
Average	0.293516			0.298355
Std Dev	0.0487844			0.0949795
Statistics: SHAM B vs TOF B
F-test	0.0600426
T-test, 1 tail, equal variance	0.443815
Statistics: SHAM A vs SHAM B			Statistics: TOF A vs TOF B
F-test	0.237649		F-test	0.0764442
T-test, 1 tail, equal variance	0.468569		T-test, 1 tail, equal variance	0.428275

## Sheet: Mitochondria
From Cropped Segmentations
SHAM A			TOF A
SHAM A Slice	% Mitochondria (% of Cellular Volume)		TOF A Slice	% Mitochondria (% of Cellular Volume)
1	0.0572609		1	0.05606
50	0.0664245		50
100	0.0822348		100	0.0827709
150	0.0945858		150	0.0847763
200	0.0982609		200	0.0654381
250	0.0929204		250	0.0614334
300	0.0847458		300	0.0784006
350	0.0906574		350	0.0575605
400	0.0946429		400	0.0972527
450	0.107206		450	0.100478
500			500	0.0876572
550			550	0.0929697
600			600
650			650
700			700
750			750
800			800
Average	0.0868939			0.078618
Std Dev	0.0150366			0.0160914
Statistics: SHAM A vs TOF A
F-test	0.848223
T-test, 1 tail, equal variance	0.119791
SHAM B			TOF B
SHAM B Slice	% Mitochondria (% of Cellular Volume)		TOF B Slice	% Mitochondria (% of Cellular Volume)
1	0.0701906		1	0.0594703
50	0.101741		50
100			100	0.0746445
150	0.0920097		150	0.0713043
200			200	0.0740446
250	0.119646		250	0.0848329
300			300	0.0684134
350			350	0.0786885
400			400	0.0849057
450	0.074141		450	0.0699865
500	0.0621469		500
550			550
600			600
650	0.0942383		650
700	0.0715596		700
750	0.0620438		750
800	0.0877963		800
850			850	0.0725284
900			900
950			950
1000			1000
Average	0.0835513			0.0738819
Std Dev	0.0187648			0.00764787
Statistics: SHAM B vs TOF B
F-test	0.0133744
T-test, 1 tail, equal variance	0.0743268
Statistics: SHAM A vs SHAM B			Statistics: TOF A vs TOF B
F-test	0.519718		F-test	0.0352698
T-test, 1 tail, equal variance	0.332739		T-test, 1 tail, equal variance	0.203917

## Sheet: Cell Content
Averages
	SHAM A	TOF A	SHAM B	TOF B
Nuclei	0.122648	0.11272	0.11099	0.107987
Myofibrils	0.294997	0.292305	0.293516	0.298355
Mitochondria	0.0868939	0.078618	0.0835513	0.0738819
	SHAM A	TOF A	SHAM B	TOF B
Extracellular Space	0.0674957	0.106591	0.193993	0.385116
Standard Deviations
	SHAM A	TOF A	SHAM B	TOF B
Nuclei	0.0234785	0.0229344	0.0237821	0.0229117
Myofibrils	0.0323735	0.0522587	0.0487844	0.0949795
Mitochondria	0.0150366	0.0160914	0.0187648	0.00764787
	SHAM A	TOF A	SHAM B	TOF B
Extracellular Space	0.0185627	0.0185741	0.0560258	0.153489
