# Supplementary material for: Multiscale cardiac imaging spanning the whole heart and its internal cellular architecture in a small animal model
Source: eLife. 2020 Oct 20;9:e58138. doi: 10.7554/eLife.58138 (PMC7595733; doi:10.7554/eLife.58138)
Supplement: Figure 10—source data 1. [file elife-58138-fig10-data1.xlsx]

## Sheet: CON A data xy_View Image Plane
ID	Label (NA)	Volume (µm³)	Surface Area (interpolated) (µm²)	Theta (°) [0, 180]	Shifted Theta (-20,160)
70	70	0.020692	1.02952	36.993	36.993	Average:	52.4061	45.9776										Average:	45
73	73	0.02072	1.04546	7.38856	7.38856	Std. Dev:	37.9328	32.4697										std. dev:	32
78	78	0.020836	1.04391	52.5712	52.5712
81	81	0.02086	1.05248	44.4388	44.4388														Row Labels	Count of Shifted Theta (-20,160)		Angle Range	Counts	Counts		x	Normal Dist
105	105	0.021212	1.08148	59.019	59.019														-20--10	3		[-20,-10]	3	3		-20	0.00158422
167	167	0.022132	1.10154	52.7854	52.7854														-10-0	4		-10-0	4	4		-18	0.00179516
175	175	0.022284	1.11329	42.4165	42.4165														0-10	7		0-10	7	7		-16	0.00202625
178	178	0.022356	1.12023	21.9672	21.9672														10-20	12		10-20	12	12		-14	0.00227817
226	226	0.023184	1.18128	40.9082	40.9082														20-30	32		20-30	32	32		-12	0.00255143
268	268	0.023848	1.21168	34.6767	34.6767														30-40	34		30-40	34	34		-10	0.00284633
273	273	0.023928	1.24364	48.4688	48.4688														40-50	42		40-50	42	42		-8	0.00316293
284	284	0.024172	1.22058	24.5517	24.5517														50-60	25		50-60	25	25		-6	0.00350104
296	296	0.024384	1.20581	47.6792	47.6792														60-70	12		60-70	12	12		-4	0.00386019
300	300	0.02444	1.22796	35.9816	35.9816														70-80	9		70-80	9	9		-2	0.00423959
302	302	0.02448	1.22718	160.959	-19.0411														90-100	2		80-90	0	0		0	0.00463813
325	325	0.024908	1.25178	35.0165	35.0165														100-110	2		90-100	2	2		2	0.00505435
341	341	0.025076	1.25153	37.9255	37.9255														110-120	1		100-110	2	2		4	0.00548644
343	343	0.025096	1.25922	58.7389	58.7389														130-140	3		110-120	1	1		6	0.00593226
357	357	0.025344	1.26848	48.2239	48.2239														140-150	4		120-130	0	0		8	0.00638929
373	373	0.025684	1.28955	28.3673	28.3673														150-160	4		130-140	3	3		10	0.00685471
377	377	0.025712	1.28098	24.8748	24.8748														Grand Total	196		140-150	4	4		12	0.00732536
386	386	0.025904	1.28243	26.7758	26.7758																	150-160	4	4		14	0.00779781
407	407	0.026248	1.3031	172.375	-7.62508																					16	0.00826836
410	410	0.026312	1.31373	44.5817	44.5817																					18	0.00873313
419	419	0.026428	1.34088	37.0527	37.0527																					20	0.00918806
424	424	0.02646	1.35868	66.8092	66.8092																					22	0.00962901
436	436	0.026644	1.3352	41.4199	41.4199																					24	0.0100518
443	443	0.026684	1.32695	53.1133	53.1133																					26	0.0104522
458	458	0.027012	1.37087	48.8427	48.8427																					28	0.0108262
463	463	0.027124	1.39013	54.1383	54.1383																					30	0.0111698
471	471	0.027244	1.36092	60.1155	60.1155																					32	0.0114795
479	479	0.027404	1.37543	46.2807	46.2807																					34	0.0117517
492	492	0.02758	1.37741	18.0928	18.0928																					36	0.0119835
500	500	0.027748	1.38579	17.5996	17.5996																					38	0.0121722
535	535	0.02844	1.46683	37.7467	37.7467																					40	0.0123157
555	555	0.028712	1.43369	94.5205	94.5205																					42	0.0124123
567	567	0.028988	1.43456	38.2411	38.2411																					44	0.0124609
636	636	0.030372	1.58025	95.9277	95.9277																					46	0.0124609
654	654	0.030736	1.53134	22.8894	22.8894																					48	0.0124123
661	661	0.030896	1.55909	64.3985	64.3985																					50	0.0123157
663	663	0.030916	1.52225	69.3734	69.3734																					52	0.0121722
699	699	0.031516	1.68327	161.933	-18.067																					54	0.0119835
703	703	0.031544	1.57292	31.257	31.257																					56	0.0117517
708	708	0.031652	1.58996	21.922	21.922																					58	0.0114795
720	720	0.032132	1.59319	33.9897	33.9897																					60	0.0111698
731	731	0.032344	1.60972	52.8255	52.8255																					62	0.0108262
732	732	0.032364	1.59439	19.3109	19.3109																					64	0.0104522
733	733	0.032372	1.61502	21.3594	21.3594																					66	0.0100518
771	771	0.032956	1.64849	52.9139	52.9139																					68	0.00962901
774	774	0.033024	1.70867	16.8845	16.8845																					70	0.00918806
780	780	0.033116	1.66657	49.868	49.868																					72	0.00873313
781	781	0.033128	1.64244	149.096	149.096																					74	0.00826836
789	789	0.03326	1.64145	42.3541	42.3541																					76	0.00779781
815	815	0.033876	1.66585	139.531	139.531																					78	0.00732536
819	819	0.03398	1.68679	31.6613	31.6613																					80	0.00685471
821	821	0.034016	1.67303	60.7865	60.7865																					82	0.00638929
845	845	0.03454	1.73274	5.56149	5.56149																					84	0.00593226
873	873	0.035084	1.73059	0.0795466	0.0795466																					86	0.00548644
885	885	0.03542	1.78649	46.906	46.906																					88	0.00505435
917	917	0.03618	1.79528	74.3145	74.3145																					90	0.00463813
952	952	0.037012	1.8386	32.9638	32.9638																					92	0.00423959
987	987	0.037852	1.88326	27.7653	27.7653																					94	0.00386019
1032	1032	0.038944	1.9275	56.0245	56.0245																					96	0.00350104
1036	1036	0.039	1.92415	56.0076	56.0076																					98	0.00316293
1088	1088	0.040952	2.03111	55.0769	55.0769																					100	0.00284633
1115	1115	0.041704	2.0776	43.8207	43.8207																					102	0.00255143
1195	1195	0.043356	2.16136	22.7717	22.7717																					104	0.00227817
1197	1197	0.04348	2.12685	43.1478	43.1478																					106	0.00202625
1209	1209	0.043992	2.23481	166.5	-13.5																					108	0.00179516
1211	1211	0.044016	2.18539	21.9059	21.9059																					110	0.00158422
1246	1246	0.045076	2.22224	31.9403	31.9403																					112	0.00139262
1247	1247	0.045124	2.25747	32.2087	32.2087																					114	0.00121942
1277	1277	0.046224	2.24653	174.058	-5.942																					116	0.0010636
1316	1316	0.047336	2.33275	57.9038	57.9038																					118	0.000924068
1326	1326	0.047632	2.36696	23.6431	23.6431																					120	0.000799714
1361	1361	0.04902	2.45134	43.4175	43.4175																					122	0.000689397
1371	1371	0.049536	2.45829	48.2301	48.2301																					124	0.00059198
1385	1385	0.049852	2.43008	13.3548	13.3548																					126	0.000506347
1404	1404	0.050472	2.4577	65.6398	65.6398																					128	0.000431413
1408	1408	0.050644	2.57329	34.2388	34.2388																					130	0.000366136
1420	1420	0.051052	2.51945	149.03	149.03																					132	0.000309524
1427	1427	0.051296	2.50161	52.5685	52.5685																					134	0.000260645
1432	1432	0.051684	2.64769	26.4978	26.4978																					136	0.00021863
1434	1434	0.051804	2.56398	34.3144	34.3144																					138	0.000182672
1449	1449	0.052344	2.58789	18.1906	18.1906																					140	0.000152033
1468	1468	0.053052	2.64694	78.1871	78.1871																					142	0.00012604
1487	1487	0.054	2.67689	152.239	152.239																					144	0.000104083
1502	1502	0.0547	2.69886	20.7011	20.7011																					146	8.56166e-05
1511	1511	0.0553	2.7244	11.8891	11.8891																					148	7.01517e-05
1531	1531	0.056508	2.79048	46.8722	46.8722																					150	5.72562e-05
1563	1563	0.057592	2.84102	5.38979	5.38979																					152	4.65489e-05
1578	1578	0.05812	2.8707	78.002	78.002																					154	3.76965e-05
1583	1583	0.058352	2.88064	147.39	147.39																					156	3.04085e-05
1591	1591	0.058912	2.90606	32.5297	32.5297																					158	2.44339e-05
1631	1631	0.060736	2.95276	22.9643	22.9643																					160	1.95567e-05
1655	1655	0.061736	3.11507	43.4805	43.4805
1678	1678	0.062524	3.10965	131.617	131.617
1685	1685	0.062996	3.09137	53.4074	53.4074
1697	1697	0.063608	3.11912	38.7659	38.7659
1702	1702	0.063896	3.13216	27.5675	27.5675
1703	1703	0.063932	3.13641	43.7578	43.7578
1715	1715	0.064692	3.19658	33.8147	33.8147
1727	1727	0.065132	3.16385	151.078	151.078
1745	1745	0.065836	3.22486	53.8174	53.8174
1752	1752	0.066092	3.31052	45.1285	45.1285
1772	1772	0.067176	3.26648	42.6121	42.6121
1791	1791	0.06806	3.37312	56.9959	56.9959
1795	1795	0.068272	3.31921	34.4459	34.4459
1821	1821	0.069968	3.47381	25.6786	25.6786
1828	1828	0.070492	3.47826	53.9335	53.9335
1851	1851	0.071676	3.51899	29.4455	29.4455
1853	1853	0.071728	3.65002	153.327	153.327
1858	1858	0.072108	3.50671	49.658	49.658
1884	1884	0.07356	3.64144	18.7656	18.7656
1887	1887	0.073652	3.64393	34.0981	34.0981
1922	1922	0.075596	3.7342	6.35109	6.35109
1926	1926	0.075884	3.70576	37.4474	37.4474
1932	1932	0.076284	3.723	68.6526	68.6526
1948	1948	0.077476	3.76654	44.4624	44.4624
1957	1957	0.0777	3.7818	43.4849	43.4849
2069	2069	0.085376	4.11968	7.7252	7.7252
2082	2082	0.08592	4.17565	23.3981	23.3981
2097	2097	0.086904	4.25648	149.763	149.763
2128	2128	0.089568	4.3842	43.0417	43.0417
2140	2140	0.090996	4.40146	175.5	-4.49984
2189	2189	0.09684	4.90588	23.8409	23.8409
2192	2192	0.096932	4.77297	38.2069	38.2069
2201	2201	0.098072	4.87271	32.0138	32.0138
2213	2213	0.098528	4.91549	60.3103	60.3103
2239	2239	0.100984	4.94595	171.351	-8.64932
2251	2251	0.102144	4.94432	9.55922	9.55922
2266	2266	0.103464	5.0887	56.4295	56.4295
2269	2269	0.103676	5.15116	37.4687	37.4687
2289	2289	0.106056	5.1912	19.4246	19.4246
2292	2292	0.106388	5.30254	31.7387	31.7387
2299	2299	0.107036	5.23741	28.7213	28.7213
2307	2307	0.108428	5.22509	22.3747	22.3747
2309	2309	0.108508	5.34429	27.8562	27.8562
2344	2344	0.112884	5.57861	71.446	71.446
2385	2385	0.117112	5.62674	32.4789	32.4789
2388	2388	0.117284	5.67359	36.0218	36.0218
2403	2403	0.119852	5.8622	131.646	131.646
2414	2414	0.121616	5.96079	26.6323	26.6323
2426	2426	0.122592	5.94416	66.0928	66.0928
2466	2466	0.127484	6.30801	19.71	19.71
2473	2473	0.12802	6.21662	55.6148	55.6148
2504	2504	0.13326	6.61606	44.2318	44.2318
2524	2524	0.137096	6.68833	50.2472	50.2472
2540	2540	0.1397	6.78246	28.6044	28.6044
2546	2546	0.140528	6.83194	36.4083	36.4083
2587	2587	0.146184	7.17093	42.9641	42.9641
2651	2651	0.157264	7.82785	73.0467	73.0467
2656	2656	0.158172	7.66384	39.498	39.498
2672	2672	0.16254	7.88015	41.7497	41.7497
2673	2673	0.16262	7.99437	44.0415	44.0415
2700	2700	0.167664	8.13208	73.1906	73.1906
2709	2709	0.169432	8.30405	35.0895	35.0895
2739	2739	0.174688	8.51857	102.351	102.351
2744	2744	0.175332	8.54158	49.0758	49.0758
2748	2748	0.17594	8.609	26.6675	26.6675
2773	2773	0.183876	8.97529	29.2124	29.2124
2776	2776	0.184336	9.09593	26.2442	26.2442
2812	2812	0.191148	9.38575	109.463	109.463
2826	2826	0.195	9.49358	49.4742	49.4742
2830	2830	0.195712	9.5008	38.0758	38.0758
2842	2842	0.20164	9.77968	42.8583	42.8583	Average:	52.1814
2878	2878	0.214784	10.3831	31.779	31.779	Std. Dev:	28.2204
2892	2892	0.218424	10.5807	42.7912	42.7912
2896	2896	0.219748	10.7217	70.1031	70.1031
2905	2905	0.22404	10.9999	23.4449	23.4449
2913	2913	0.225864	10.9824	76.372	76.372
2924	2924	0.229316	11.2366	69.4747	69.4747
2931	2931	0.231964	11.256	28.065	28.065
2987	2987	0.249264	12.1076	27.9899	27.9899
3041	3041	0.27322	13.4654	156.314	156.314
3047	3047	0.274668	13.4249	113.218	113.218
3058	3058	0.283088	13.8526	43.8496	43.8496
3111	3111	0.314276	15.4637	78.6518	78.6518
3115	3115	0.31714	15.3644	45.241	45.241
3123	3123	0.32464	15.7494	68.4732	68.4732
3137	3137	0.329936	16.0888	53.7238	53.7238
3180	3180	0.366808	17.8468	18.439	18.439
3189	3189	0.370072	18.0188	14.6903	14.6903
3198	3198	0.376568	18.4692	63.2627	63.2627
3226	3226	0.412568	20.0231	46.2326	46.2326
3233	3233	0.421804	20.5286	21.0199	21.0199
3235	3235	0.426376	20.7306	57.7125	57.7125
3270	3270	0.483796	23.5244	40.5454	40.5454
3272	3272	0.486376	23.3529	49.0079	49.0079
3273	3273	0.48678	23.6703	31.555	31.555
3328	3328	0.618664	29.9661	47.6229	47.6229
3338	3338	0.661468	32.2131	52.7932	52.7932
3378	3378	0.933652	45.2087	51.5071	51.5071
3395	3395	1.29781	62.919	43.7168	43.7168
3399	3399	1.52036	73.6704	47.4483	47.4483
3403	3403	1.59459	77.1185	59.7198	59.7198
