# Supplementary material for: Multiscale cardiac imaging spanning the whole heart and its internal cellular architecture in a small animal model
Source: eLife. 2020 Oct 20;9:e58138. doi: 10.7554/eLife.58138 (PMC7595733; doi:10.7554/eLife.58138)
Supplement: Figure 10—source data 2. [file elife-58138-fig10-data2.xlsx]

## Sheet: CON A data_xz View
Time Step	ID	Label (NA)	Voxel count (NA)	Volume (µm³)	Surface Area (interpolated) (µm²)		Phi (°) [-180, 180]	Angle xz plane [0-180]
0	1	1	1	0.0004	0.0812045		90	90
0	2	2	2	0.0008	0.100142		90	90
0	3	3	3	0.0012	0.232589		0	180
0	4	4	4	0.0016	0.224956		106.485	106.485
0	5	5	5	0.002	0.383974		0	180
0	6	6	10	0.004	0.762437		0	180
0	7	7	13	0.0052	0.523059		66.2228	66.2228
0	8	8	32	0.0128	0.911904		143.495	143.495
0	9	9	49	0.0196	0.675681		90	90
0	10	10	49	0.0196	0.675681		90	90
0	11	11	49	0.0196	0.675681		90	90
0	12	12	56	0.0224	0.755823		90	90
0	13	13	56	0.0224	0.699068		90	90
0	14	14	56	0.0224	0.755823		90	90
0	15	15	56	0.0224	0.755823		90	90
0	16	16	56	0.0224	0.755823		90	90
0	17	17	56	0.0224	0.755823		90	90
0	18	18	63	0.0252	0.835965		90	90
0	19	19	70	0.028	0.916107		90	90
0	20	20	70	0.028	0.916107		90	90
0	21	21	70	0.028	0.916107		90	90
0	22	22	72	0.0288	0.860835		90	90
0	23	23	72	0.0288	0.860835		90	90
0	24	24	77	0.0308	0.996249		90	90
0	25	25	78	0.0312	0.913665		91.1558	91.1558
0	26	26	84	0.0336	1.07639		90	90
0	27	27	84	0.0336	1.07639		90	90
0	28	28	91	0.0364	1.15653		90	90
0	29	29	104	0.0416	1.18437		90	90
0	30	30	112	0.0448	1.26525		90	90
0	31	31	112	0.0448	1.38021		75.8496	75.8496
0	32	32	119	0.0476	1.4771		90	90										Median:	72.0276
0	33	33	121	0.0484	1.39526		86.07	86.07
0	34	34	126	0.0504	1.55724		90	90										Average:	70.7233
0	35	35	133	0.0532	1.63739		90	90										Std. Dev:	36.1809
0	36	36	133	0.0532	1.63739		90	90
0	37	37	141	0.0564	1.19289		86.2695	86.2695								Normal Distribution:
0	38	38	154	0.0616	1.87781		90	90	Shifted									x	dist							Angle	Count
0	39	39	155	0.062	1.5802		97.9744	97.9744	97.9744									0	0.00163203							0-10	7
0	40	40	161	0.0644	1.95795		90	90	90									2	0.00181548							10-20	5
0	41	41	170	0.068	1.59132		93.8061	93.8061	93.8061									4	0.00201339							20-30	7
0	42	42	217	0.0868	2.59909		0	180	0									6	0.00222606							30-40	14
0	43	43	217	0.0868	2.59909		0	180	0									8	0.00245369							40-50	16
0	44	44	222	0.0888	2.56785		-154.327	25.6733	25.6733									10	0.00269634							50-60	14
0	45	45	224	0.0896	2.67923		0	180	0									12	0.00295394							60-70	19
0	46	46	235	0.094	2.3239		69.0333	69.0333	69.0333									14	0.00322629							70-80	19
0	47	47	253	0.1012	2.25869		78.3743	78.3743	78.3743									16	0.00351299							80-90	20
0	48	48	259	0.1036	2.44208		62.5201	62.5201	62.5201									18	0.0038135							90-100	18
0	49	49	259	0.1036	3.07994		0	180	0									20	0.00412708							100-110	6
0	50	50	264	0.1056	2.80204		0	180	0									22	0.00445283							110-120	3
0	51	51	265	0.106	2.36796		93.8772	93.8772	93.8772									24	0.00478962							120-130	5
0	52	52	267	0.1068	2.72094		122.705	122.705	122.705									26	0.00513617							130-140	3
0	53	53	277	0.1108	2.3383		105.861	105.861	105.861									28	0.005491							140-150	1
0	54	54	278	0.1112	2.18221		79.9426	79.9426	79.9426									30	0.00585242							150-160	2
0	55	55	280	0.112	1.80388		87.4913	87.4913	87.4913									32	0.00621861							160-170	1
0	56	56	297	0.1188	3.29803		-179.6	0.399838	0.399838									34	0.00658754							170-180	3
0	57	57	323	0.1292	2.36765		94.1575	94.1575	94.1575									36	0.00695708
0	58	58	328	0.1312	3.4276		-157.215	22.7855	22.7855									38	0.00732492
0	59	59	342	0.1368	2.63317		97.912	97.912	97.912									40	0.00768869
0	60	60	349	0.1396	3.19651		126.923	126.923	126.923									42	0.00804589
0	61	61	387	0.1548	3.37966		92.9826	92.9826	92.9826									44	0.00839401
0	62	62	416	0.1664	3.62631		-156.696	23.3035	23.3035									46	0.00873047
0	63	63	431	0.1724	4.73815		-176.903	3.09676	3.09676									48	0.00905271
0	64	64	453	0.1812	3.64291		59.2242	59.2242	59.2242									50	0.0093582
0	65	65	461	0.1844	4.5588		-162.939	17.0613	17.0613									52	0.00964449
0	66	66	462	0.1848	4.22955		-139.552	40.4476	40.4476									54	0.00990921
0	67	67	498	0.1992	3.44667		100.424	100.424	100.424									56	0.0101501
0	68	68	524	0.2096	4.42688		52.5705	52.5705	52.5705									58	0.0103652
0	69	69	567	0.2268	4.414		-142.293	37.7073	37.7073									60	0.0105525
0	70	70	569	0.2276	4.67167		134.42	134.42	134.42									62	0.0107105
0	71	71	583	0.2332	3.87464		87.658	87.658	87.658									64	0.0108376
0	72	72	590	0.236	3.81729		84.0125	84.0125	84.0125									66	0.0109328
0	73	73	599	0.2396	4.32278		127.954	127.954	127.954									68	0.0109951
0	74	74	605	0.242	4.06671		88.3726	88.3726	88.3726									70	0.0110241
0	75	75	609	0.2436	3.9085		92.4523	92.4523	92.4523									72	0.0110195
0	76	76	610	0.244	4.53398		146.285	146.285	-33.7153									74	0.0109812
0	77	77	672	0.2688	4.58502		58.1388	58.1388	58.1388									76	0.0109097
0	78	78	678	0.2712	6.26712		-171.607	8.39263	8.39263									78	0.0108056
0	79	79	732	0.2928	4.89076		89.8544	89.8544	89.8544									80	0.0106698
0	80	80	754	0.3016	4.84556		116.139	116.139	116.139									82	0.0105036
0	81	81	779	0.3116	5.02888		67.1436	67.1436	67.1436									84	0.0103084
0	82	82	795	0.318	5.55817		71.7118	71.7118	71.7118									86	0.010086
0	83	83	819	0.3276	5.84372		-172.155	7.84484	7.84484									88	0.00983827
0	84	84	823	0.3292	6.24006		91.6166	91.6166	91.6166									90	0.00956735
0	85	85	838	0.3352	5.63699		75.3167	75.3167	75.3167									92	0.0092755
0	86	86	871	0.3484	6.32982		-137.914	42.0865	42.0865									94	0.00896513
0	87	87	915	0.366	7.20987		92.2626	92.2626	92.2626									96	0.0086387
0	88	88	922	0.3688	6.04603		-135.29	44.7096	44.7096									98	0.00829876
0	89	89	923	0.3692	6.1519		-139.701	40.299	40.299									100	0.00794787
0	90	90	929	0.3716	6.75928		-168.632	11.3678	11.3678									102	0.0075886
0	91	91	952	0.3808	5.41957		81.6099	81.6099	81.6099									104	0.00722346
0	92	92	974	0.3896	7.17939		-171.032	8.96761	8.96761									106	0.00685491
0	93	93	982	0.3928	7.03181		174.623	174.623	-5.37727									108	0.00648532
0	94	94	990	0.396	7.65699		-157.129	22.871	22.871									110	0.00611694
0	95	95	1004	0.4016	5.68732		89.0482	89.0482	89.0482									112	0.00575188
0	96	96	1005	0.402	6.52999		60.3756	60.3756	60.3756									114	0.0053921
0	97	97	1101	0.4404	6.29518		53.2343	53.2343	53.2343									116	0.00503941
0	98	98	1101	0.4404	5.35835		91.9761	91.9761	91.9761									118	0.00469541
0	99	99	1107	0.4428	6.84868		98.3161	98.3161	98.3161									120	0.00436155
0	100	100	1148	0.4592	8.73467		-156.526	23.4743	23.4743									122	0.00403907
0	101	101	1174	0.4696	6.23797		88.4718	88.4718	88.4718									124	0.00372902
0	102	102	1175	0.47	7.78942		156.736	156.736	-23.264									126	0.00343226
0	103	103	1207	0.4828	7.3623		-153.485	26.5152	26.5152									128	0.00314949
0	104	104	1238	0.4952	9.56724		-169.042	10.9583	10.9583									130	0.00288119
0	105	105	1253	0.5012	7.10065		128.247	128.247	128.247									132	0.00262771
0	106	106	1253	0.5012	6.9275		95.5099	95.5099	95.5099									134	0.00238921
0	107	107	1442	0.5768	7.56893		59.952	59.952	59.952									136	0.00216574
0	108	108	1477	0.5908	7.50807		135.892	135.892	135.892									138	0.00195717
0	109	109	1510	0.604	9.00372		-135.675	44.3255	44.3255									140	0.0017633
0	110	110	1552	0.6208	8.57505		164.057	164.057	-15.9426									142	0.00158378
0	111	111	1579	0.6316	13.434		-144.393	35.6073	35.6073									144	0.0014182
0	112	112	1641	0.6564	9.25843		53.516	53.516	53.516									146	0.00126606
0	113	113	1659	0.6636	8.59114		156.274	156.274	-23.7265									148	0.00112679
0	114	114	1780	0.712	8.55465		57.7652	57.7652	57.7652									150	0.00099978
0	115	115	1796	0.7184	11.3811		-166.361	13.6387	13.6387									152	0.00088438
0	116	116	1871	0.7484	9.46611		56.6703	56.6703	56.6703									154	0.000779914
0	117	117	1886	0.7544	8.86058		117.054	117.054	117.054									156	0.000685689
0	118	118	1948	0.7792	8.20296		78.8297	78.8297	78.8297									158	0.000601008
0	119	119	1984	0.7936	10.525		80.0988	80.0988	80.0988									160	0.000525178
0	120	120	2039	0.8156	13.2161		-170.653	9.34701	9.34701									162	0.000457516
0	121	121	2070	0.828	9.82511		-137.596	42.4039	42.4039									164	0.000397355
0	122	122	2117	0.8468	10.0666		47.4108	47.4108	47.4108									166	0.000344051
0	123	123	2222	0.8888	10.2788		-164.619	15.3809	15.3809									168	0.00029699
0	124	124	2279	0.9116	12.4535		-151.822	28.1781	28.1781									170	0.000255583
0	125	125	2334	0.9336	11.1099		109.366	109.366	109.366									172	0.000219279
0	126	126	2377	0.9508	10.5872		94.2248	94.2248	94.2248									174	0.000187557
0	127	127	2401	0.9604	11.9094		-142.752	37.2485	37.2485									176	0.000159935
0	128	128	2424	0.9696	11.4259		-144.628	35.3721	35.3721									178	0.000135965
0	129	129	2541	1.0164	12.2771		95.6602	95.6602	95.6602									180	0.000115234
0	130	130	2648	1.0592	12.4353		129.974	129.974	129.974
0	131	131	2664	1.0656	13.085		-143.523	36.4772	36.4772
0	132	132	2682	1.0728	10.9185		63.2403	63.2403	63.2403
0	133	133	2734	1.0936	10.8621		51.743	51.743	51.743
0	134	134	2744	1.0976	15.506		84.7518	84.7518	84.7518
0	135	135	2801	1.1204	16.8682		-149.343	30.6571	30.6571
0	136	136	3214	1.2856	8.27851		93.512	93.512	93.512
0	137	137	3466	1.3864	13.9046		175.801	175.801	-4.19885
0	138	138	3621	1.4484	20.4863		45.9407	45.9407	45.9407
0	139	139	3702	1.4808	16.6377		52.5927	52.5927	52.5927
0	140	140	3733	1.4932	20.8761		96.3199	96.3199	96.3199
0	141	141	3741	1.4964	12.7219		84.5512	84.5512	84.5512
0	142	142	3822	1.5288	15.0476		48.6988	48.6988	48.6988
0	143	143	3972	1.5888	14.9405		48.0798	48.0798	48.0798
0	144	144	3973	1.5892	13.6708		90.7304	90.7304	90.7304
0	145	145	4317	1.7268	20.1686		179.186	179.186	-0.814458
0	146	146	4469	1.7876	15.8995		71.0903	71.0903	71.0903
0	147	147	4505	1.802	17.6652		-144.432	35.5676	35.5676
0	148	148	4991	1.9964	20.1828		46.2962	46.2962	46.2962
0	149	149	5164	2.0656	15.3271		74.1397	74.1397	74.1397
0	150	150	5488	2.1952	19.9464		70.9009	70.9009	70.9009
0	151	151	5627	2.2508	23.8691		-148.984	31.0156	31.0156
0	152	152	5842	2.3368	25.709		-139.02	40.9798	40.9798
0	153	153	5896	2.3584	20.4947		109.595	109.595	109.595
0	154	154	5917	2.3668	19.4641		74.9781	74.9781	74.9781
0	155	155	6049	2.4196	32.4498		-144.605	35.3952	35.3952
0	156	156	6200	2.48	16.9667		82.3142	82.3142	82.3142
0	157	157	6319	2.5276	19.5776		45.4458	45.4458	45.4458
0	158	158	6457	2.5828	23.1665		-137.121	42.8785	42.8785
0	159	159	6574	2.6296	19.2723		79.4538	79.4538	79.4538
0	160	160	6725	2.69	18.0328		85.7711	85.7711	85.7711
0	161	161	7391	2.9564	22.4059		74.8237	74.8237	74.8237
0	162	162	7518	3.0072	26.2753		-136.812	43.1884	43.1884
0	163	163	7519	3.0076	22.0894		80.5373	80.5373	80.5373
0	164	164	7684	3.0736	26.6965		63.6595	63.6595	63.6595
0	165	165	8110	3.244	36.4088		-158.749	21.2507	21.2507
0	166	166	8330	3.332	29.4556		103.091	103.091	103.091
0	167	167	8444	3.3776	22.7644		80.0429	80.0429	80.0429
0	168	168	8481	3.3924	25.7612		92.2162	92.2162	92.2162
0	169	169	9013	3.6052	22.6673		107.519	107.519	107.519
0	170	170	9467	3.7868	30.8421		66.8433	66.8433	66.8433
0	171	171	9542	3.8168	26.1282		69.1809	69.1809	69.1809
0	172	172	10203	4.0812	31.9307		55.8517	55.8517	55.8517
0	173	173	10235	4.094	35.0127		112.944	112.944	112.944
0	174	174	10294	4.1176	20.8949		81.9423	81.9423	81.9423
0	175	175	10301	4.1204	22.8401		82.2704	82.2704	82.2704
0	176	176	10970	4.388	35.9096		54.207	54.207	54.207
0	177	177	11141	4.4564	29.8364		65.2131	65.2131	65.2131
0	178	178	11215	4.486	45.9364		67.8546	67.8546	67.8546
0	179	179	11366	4.5464	46.5261		-147.464	32.5365	32.5365
0	180	180	11480	4.592	39.2082		-140.145	39.8551	39.8551
0	181	181	11785	4.714	41.9412		73.9339	73.9339	73.9339
0	182	182	12267	4.9068	28.4893		68.8283	68.8283	68.8283
0	183	183	12579	5.0316	49.8329		-146.324	33.6761	33.6761
0	184	184	13124	5.2496	35.2877		72.3434	72.3434	72.3434
0	185	185	13159	5.2636	32.0666		67.3778	67.3778	67.3778
0	186	186	13735	5.494	44.4175		133.902	133.902	133.902
0	187	187	13985	5.594	33.0082		88.1212	88.1212	88.1212
0	188	188	14083	5.6332	41.9757		67.6288	67.6288	67.6288
0	189	189	14163	5.6652	32.5983		76.6082	76.6082	76.6082
0	190	190	14204	5.6816	43.3999		62.0311	62.0311	62.0311
0	191	191	16455	6.582	54.4128		68.5506	68.5506	68.5506
0	192	192	16813	6.7252	34.965		87.5563	87.5563	87.5563
0	193	193	16962	6.7848	55.4238		64.1382	64.1382	64.1382
0	194	194	17525	7.01	50.245		83.1538	83.1538	83.1538
0	195	195	17925	7.17	48.7338		-145.274	34.7261	34.7261
0	196	196	18255	7.302	55.9798		50.4366	50.4366	50.4366
0	197	197	18460	7.384	49.8363		63.2207	63.2207	63.2207
0	198	198	18592	7.4368	64.6027		-172.867	7.13336	7.13336
0	199	199	21290	8.516	61.9409		65.511	65.511	65.511
0	200	200	21485	8.594	51.3825		63.2306	63.2306	63.2306
0	201	201	22025	8.81	59.3678		68.5112	68.5112	68.5112
0	202	202	22339	8.9356	57.7076		97.5797	97.5797	97.5797
0	203	203	24471	9.7884	72.1693		59.688	59.688	59.688
0	204	204	26755	10.702	54.0989		75.3789	75.3789	75.3789
0	205	205	26868	10.7472	105.271		-142.559	37.4409	37.4409
0	206	206	29113	11.6452	71.4573		79.1566	79.1566	79.1566
0	207	207	29310	11.724	60.657		75.1842	75.1842	75.1842
0	208	208	30179	12.0716	56.5533		76.2629	76.2629	76.2629
0	209	209	31012	12.4048	62.5163		93.3939	93.3939	93.3939
0	210	210	32585	13.034	61.2834		75.0847	75.0847	75.0847
0	211	211	33973	13.5892	97.0363		-137.488	42.512	42.512
0	212	212	34159	13.6636	69.7872		77.2517	77.2517	77.2517
0	213	213	39447	15.7788	82.3723		68.4874	68.4874	68.4874
0	214	214	43306	17.3224	131.979		91.3671	91.3671	91.3671
