# Supplementary material for: Multiscale cardiac imaging spanning the whole heart and its internal cellular architecture in a small animal model
Source: eLife. 2020 Oct 20;9:e58138. doi: 10.7554/eLife.58138 (PMC7595733; doi:10.7554/eLife.58138)
Supplement: Figure 10—source data 3. [file elife-58138-fig10-data3.xlsx]

## Sheet: TOF A data xy_View Image Plane
ID	Label (NA)	Volume (µm³)	Surface Area (interpolated) (µm²)	Theta (°)	Theta Shifted (-90,90)
17	17	1.6e-05	0.0031769	0	0		Average:	6.6539
28	28	4.8e-05	0.00613758	124.722	-55.278		Std. Dev:	19.3967											Row Labels	Count of Theta Shifted (-90,90)			Angle Range	Counts	Normal		x	Normal Dist
29	29	5.2e-05	0.00630404	151.236	-28.7644														-80--70	2			[-80,-70]	2	2		-80	9.53546e-07
51	51	0.000124	0.0116946	168.679	-11.3208														-60--50	2			[-70,-60]	0	0		-78	1.50344e-06
55	55	0.000132	0.0120654	20.4572	20.4572														-50--40	1			[-60,-50]	2	2		-76	2.34538e-06
62	62	0.000152	0.0136061	45	45														-40--30	1			[-50,-40]	1	1		-74	3.62012e-06
63	63	0.000156	0.0134657	167.276	-12.7244														-30--20	4			[-40,-30]	1	1		-72	5.5286e-06
97	97	0.000276	0.0213689	9.15933	9.15933														-20--10	16			[-30,-20]	4	4		-70	8.35391e-06
110	110	0.00032	0.024291	41.7525	41.7525														-10-0	40			[-20,-10]	16	16		-68	1.24896e-05
116	116	0.000336	0.0247258	36.2382	36.2382														0-10	70			[-10,0]	40	40		-66	1.84752e-05
129	129	0.000384	0.028197	1.49589	1.49589														10-20	36			[0,10]	70	70		-64	2.70403e-05
130	130	0.000384	0.0275453	31.4141	31.4141														20-30	20			[10,20]	36	36		-62	3.91577e-05
131	131	0.000396	0.0287153	7.72636	7.72636														30-40	13			[20,30]	20	20		-60	5.61056e-05
135	135	0.000408	0.0295405	25.3491	25.3491														40-50	5			[30,40]	13	13		-58	7.95385e-05
145	145	0.00046	0.0322765	167.464	-12.5363														50-60	2			[40,50]	5	5		-56	0.000111566
167	167	0.000556	0.0393742	12.8089	12.8089														70-80	1			[50,60]	2	2		-54	0.000154835
168	168	0.00056	0.0374684	51.7209	51.7209														>80	1			[60,70]	0	0		-52	0.000212612
176	176	0.000596	0.0400575	178.984	-1.01551														Grand Total	214			[70,80]	1	1		-50	0.000288862
179	179	0.000604	0.0427885	13.5497	13.5497																		[80,90]	1	1		-48	0.000388307
187	187	0.00064	0.0441881	177.719	-2.28115																						-46	0.000516467
192	192	0.000652	0.043229	168.616	-11.3843																						-44	0.000679662
238	238	0.00098	0.0619815	7.99329	7.99329																						-42	0.000884964
256	256	0.001072	0.0688938	3.91942	3.91942																						-40	0.0011401
257	257	0.001072	0.065901	164.626	-15.3742																						-38	0.00145325
294	294	0.001364	0.0812195	19.7877	19.7877																						-36	0.00183283
311	311	0.00152	0.0998267	175.884	-4.11599																						-34	0.0022871
313	313	0.001532	0.0907907	15.9796	15.9796																						-32	0.00282379
315	315	0.00154	0.0917752	79.1841	79.1841																						-30	0.00344954
316	316	0.001548	0.0984007	3.39033	3.39033																						-28	0.0041694
318	318	0.001564	0.0928308	173.793	-6.20667																						-26	0.00498618
321	321	0.001588	0.0954206	23.2922	23.2922																						-24	0.00589991
352	352	0.001908	0.117314	18.8462	18.8462																						-22	0.00690726
379	379	0.002216	0.130783	0.692307	0.692307																						-20	0.00800109
391	391	0.002336	0.135061	101.756	-78.2437																						-18	0.00917011
396	396	0.002428	0.140571	12.1894	12.1894																						-16	0.0103988
404	404	0.002504	0.147011	5.02127	5.02127																						-14	0.0116674
436	436	0.002916	0.170422	177.758	-2.24224																						-12	0.0129523
439	439	0.002928	0.165531	9.90417	9.90417																						-10	0.0142267
441	441	0.002952	0.164226	165.245	-14.7549																						-8	0.0154612
448	448	0.003036	0.173416	14.7766	14.7766																						-6	0.0166252
450	450	0.003056	0.176127	2.56898	2.56898																						-4	0.0176877
463	463	0.003224	0.178849	24.9087	24.9087																						-2	0.0186191
472	472	0.00328	0.17966	129.759	-50.2409																						0	0.0193922
477	477	0.003352	0.190173	13.0017	13.0017																						2	0.0199839
489	489	0.003476	0.197435	8.79581	8.79581																						4	0.0203759
499	499	0.00364	0.199263	43.4399	43.4399																						6	0.0205558
546	546	0.00424	0.229566	34.4514	34.4514																						8	0.020518
552	552	0.004352	0.238133	13.0012	13.0012																						10	0.0202637
559	559	0.004412	0.248191	152.842	-27.1577																						12	0.0198009
599	599	0.004964	0.278876	7.39038	7.39038																						14	0.0191441
604	604	0.005028	0.270659	3.32031	3.32031																						16	0.0183133
605	605	0.005048	0.269915	6.25187	6.25187																						18	0.0173333
608	608	0.005096	0.28446	169.53	-10.4704																						20	0.0162322
618	618	0.00528	0.283661	168.043	-11.9566																						22	0.0150404
631	631	0.005424	0.292677	80.0925	80.0925																						24	0.0137886
650	650	0.005764	0.308473	178.101	-1.89942																						26	0.0125074
653	653	0.005812	0.314767	173.102	-6.89826																						28	0.0112252
664	664	0.006048	0.318625	170.985	-9.01536																						30	0.00996794
683	683	0.006396	0.339956	12.4196	12.4196																						32	0.00875788
711	711	0.006876	0.368016	4.61763	4.61763																						34	0.00761334
724	724	0.007048	0.376757	11.5801	11.5801																						36	0.00654838
742	742	0.007312	0.381318	25.8655	25.8655																						38	0.00557283
744	744	0.007368	0.407724	173.079	-6.92091																						40	0.00469246
749	749	0.0075	0.39623	2.42614	2.42614																						42	0.00390938
753	753	0.007556	0.398174	10.116	10.116																						44	0.00322253
768	768	0.007988	0.419962	20.556	20.556																						46	0.00262827
771	771	0.008036	0.422668	155.195	-24.8053																						48	0.00212092
782	782	0.008252	0.437207	18.8651	18.8651																						50	0.00169341
784	784	0.008268	0.433421	22.3405	22.3405																						52	0.00133778
813	813	0.00874	0.454048	173.514	-6.48616																						54	0.00104565
816	816	0.0089	0.458108	175.296	-4.70424																						56	0.000808674
846	846	0.009572	0.494839	136.696	-43.3043																						58	0.000618789
877	877	0.010292	0.536747	6.14268	6.14268																						60	0.000468483
886	886	0.010456	0.541738	168.849	-11.1514																						62	0.000350936
890	890	0.010532	0.542366	2.02437	2.02437																						64	0.000260103
897	897	0.010684	0.561652	174.543	-5.45735																						66	0.000190741
926	926	0.011448	0.593112	1.84671	1.84671																						68	0.000138397
942	942	0.011792	0.605893	25.2251	25.2251																						70	9.93556e-05
947	947	0.011888	0.605372	4.65969	4.65969																						72	7.05733e-05
952	952	0.011944	0.623413	3.66705	3.66705																						74	4.95988e-05
953	953	0.011976	0.621384	177.276	-2.7243																						76	3.44893e-05
957	957	0.012016	0.612684	42.9947	42.9947																						78	2.3729e-05
963	963	0.012172	0.626559	35.7203	35.7203																						80	1.61532e-05
967	967	0.0123	0.656833	178.931	-1.06911																						82	1.08798e-05
981	981	0.01272	0.643534	12.6143	12.6143																						84	7.25045e-06
987	987	0.012856	0.676617	2.6511	2.6511																						86	4.7807e-06
997	997	0.013172	0.672042	1.52777	1.52777																						88	3.1189e-06
1005	1005	0.013324	0.687126	12.9388	12.9388																						90	2.01323e-06
1020	1020	0.013644	0.695586	2.49284	2.49284
1039	1039	0.0142	0.736514	179.979	-0.0211814
1069	1069	0.015304	0.775944	7.06588	7.06588
1114	1114	0.016772	0.858935	24.383	24.383
1126	1126	0.017152	0.868547	168.2	-11.8
1137	1137	0.017516	0.891517	4.17667	4.17667
1162	1162	0.018308	0.924738	163.679	-16.3211
1179	1179	0.018744	0.976322	161.094	-18.9062
1182	1182	0.018796	0.96892	10.3625	10.3625
1185	1185	0.01886	0.947981	171.981	-8.01933
1203	1203	0.019496	0.987382	22.7272	22.7272
1254	1254	0.02148	1.07815	1.26322	1.26322
1257	1257	0.021624	1.08302	175.114	-4.88638
1293	1293	0.022784	1.14603	37.5105	37.5105
1306	1306	0.023372	1.19355	168.23	-11.7705
1316	1316	0.023788	1.18945	22.5172	22.5172
1320	1320	0.023884	1.19191	10.7036	10.7036
1332	1332	0.024668	1.25172	0.194598	0.194598
1337	1337	0.024976	1.26055	1.85366	1.85366
1356	1356	0.025668	1.27702	175.967	-4.03334
1366	1366	0.025876	1.30073	12.2259	12.2259
1379	1379	0.02652	1.36871	21.2593	21.2593
1384	1384	0.026644	1.32142	30.8638	30.8638
1398	1398	0.0275	1.39563	21.9345	21.9345
1399	1399	0.027528	1.3697	14.7768	14.7768
1413	1413	0.028292	1.41522	3.31474	3.31474
1424	1424	0.028832	1.43998	175.981	-4.01932
1426	1426	0.028912	1.45399	4.77314	4.77314
1463	1463	0.030688	1.51847	174.671	-5.32875
1480	1480	0.0314	1.55225	3.59534	3.59534
1496	1496	0.031892	1.57453	145.227	-34.7728
1504	1504	0.032452	1.61298	40.0972	40.0972
1509	1509	0.032664	1.63544	6.22407	6.22407
1523	1523	0.033184	1.638	21.1359	21.1359
1525	1525	0.033196	1.65329	12.5472	12.5472
1554	1554	0.03506	1.73982	17.3731	17.3731
1555	1555	0.035064	1.76192	11.1307	11.1307
1558	1558	0.035348	1.75318	176.326	-3.67358
1560	1560	0.035368	1.76398	10.4931	10.4931
1566	1566	0.035652	1.79042	175.258	-4.7421
1573	1573	0.036088	1.81401	9.72639	9.72639
1576	1576	0.036156	1.80935	10.6234	10.6234
1583	1583	0.036576	1.83096	16.0874	16.0874
1602	1602	0.037572	1.89212	5.31018	5.31018
1620	1620	0.039192	1.93504	5.45003	5.45003
1642	1642	0.040704	2.0009	8.22163	8.22163
1647	1647	0.040892	2.07126	25.4413	25.4413
1648	1648	0.040904	2.02615	164.227	-15.7732
1660	1660	0.04212	2.17496	5.39727	5.39727
1663	1663	0.04232	2.08854	1.4547	1.4547
1676	1676	0.043696	2.22119	0.806831	0.806831
1679	1679	0.043964	2.15212	27.3278	27.3278
1708	1708	0.046564	2.29193	6.88592	6.88592
1741	1741	0.048892	2.41648	178.786	-1.2136
1742	1742	0.048976	2.40946	175.358	-4.64188
1750	1750	0.049612	2.48618	12.5662	12.5662
1752	1752	0.049936	2.48929	177.684	-2.3161
1759	1759	0.05046	2.49738	176.262	-3.73758
1771	1771	0.051152	2.55588	37.7463	37.7463
1772	1772	0.051156	2.51915	18.1838	18.1838
1786	1786	0.052088	2.64046	12.1309	12.1309
1787	1787	0.052168	2.58526	11.8669	11.8669
1894	1894	0.06226	3.06285	30.5792	30.5792
1912	1912	0.064576	3.14341	171.443	-8.55715
1917	1917	0.065256	3.26938	176.915	-3.08469
1927	1927	0.066572	3.25332	7.28286	7.28286
1932	1932	0.06734	3.25703	173.621	-6.3791
1935	1935	0.067788	3.38627	32.6767	32.6767
1937	1937	0.067916	3.40122	6.38829	6.38829
1956	1956	0.069988	3.41244	158.558	-21.4419
1971	1971	0.071552	3.48339	26.1206	26.1206
2021	2021	0.079464	3.92538	176.875	-3.12533
2028	2028	0.080368	3.91964	32.6633	32.6633
2034	2034	0.081164	3.98079	0.830682	0.830682
2047	2047	0.083692	4.08433	4.10566	4.10566
2049	2049	0.08374	4.1305	179.495	-0.504842
2055	2055	0.084764	4.1782	5.87196	5.87196
2056	2056	0.084784	4.12791	9.13838	9.13838
2064	2064	0.085804	4.13383	107.438	-72.5624
2078	2078	0.088808	4.35393	8.72488	8.72488
2100	2100	0.09266	4.55894	8.56758	8.56758
2118	2118	0.095572	4.6701	54.3328	54.3328
2122	2122	0.096156	4.64132	30.6653	30.6653
2130	2130	0.097784	4.81689	174.78	-5.21998
2134	2134	0.098532	4.79074	169.587	-10.4128
2140	2140	0.099564	5.04178	179.396	-0.604216
2149	2149	0.100924	4.96517	20.6782	20.6782
2151	2151	0.101148	4.97536	9.45138	9.45138
2211	2211	0.114776	5.61356	6.23983	6.23983
2229	2229	0.12012	5.86214	5.09723	5.09723
2231	2231	0.120956	5.88264	14.0767	14.0767
2236	2236	0.12148	5.89088	31.5084	31.5084
2238	2238	0.12156	5.95924	5.24119	5.24119
2241	2241	0.122384	6.00227	21.9774	21.9774
2267	2267	0.129128	6.22848	179.763	-0.237135
2286	2286	0.1336	6.50341	6.67911	6.67911
2289	2289	0.13408	6.60711	19.8798	19.8798
2299	2299	0.138256	6.88978	2.07933	2.07933
2301	2301	0.140788	6.91915	179.493	-0.50677
2312	2312	0.144544	7.02532	172.136	-7.8639
2320	2320	0.146972	7.20005	8.91983	8.91983
2325	2325	0.148008	7.22659	1.18177	1.18177
2368	2368	0.16478	8.08183	6.88425	6.88425
2370	2370	0.165396	8.07302	34.0565	34.0565
2371	2371	0.166408	8.08531	2.16275	2.16275
2378	2378	0.172148	8.38794	1.21475	1.21475
2379	2379	0.172572	8.30416	171.832	-8.1679
2395	2395	0.178472	8.62149	13.5018	13.5018
2400	2400	0.180236	8.86789	173.062	-6.93828
2401	2401	0.180716	8.96005	6.33481	6.33481
2402	2402	0.181248	8.88626	3.11589	3.11589
2430	2430	0.199256	9.70396	4.21079	4.21079
2436	2436	0.203304	9.81327	166.614	-13.3859
2443	2443	0.205184	9.84029	13.0784	13.0784
2447	2447	0.208476	10.1792	3.78646	3.78646
2463	2463	0.2208	10.689	179.783	-0.216825
2466	2466	0.223172	10.9055	173.055	-6.94505
2504	2504	0.2643	12.6352	28.9906	28.9906
2553	2553	0.3278	16.0243	18.2809	18.2809
2571	2571	0.354016	17.174	8.53876	8.53876
2573	2573	0.355104	17.204	18.9183	18.9183
2582	2582	0.367348	17.7915	9.38843	9.38843
2599	2599	0.421228	20.0899	0.373829	0.373829
2605	2605	0.438632	21.2361	4.91921	4.91921
2608	2608	0.452796	21.9041	16.5825	16.5825
2629	2629	0.499532	24.1632	9.37893	9.37893
