# Supplementary material for: Multiscale cardiac imaging spanning the whole heart and its internal cellular architecture in a small animal model
Source: eLife. 2020 Oct 20;9:e58138. doi: 10.7554/eLife.58138 (PMC7595733; doi:10.7554/eLife.58138)
Supplement: Figure 10—source data 4. [file elife-58138-fig10-data4.xlsx]

## Sheet: TOF A data_xz View
ID	Label (NA)	Voxel count (NA)	Volume (µm³)	Surface Area (interpolated) (µm²)		Phi (°) [-180, 180]	Phi* [0-180]
1	1	40	0.016	0.707566		90	90
2	2	50	0.02	0.864884		90	90
3	3	76	0.0304	1.10064		87.3187	87.3187
4	4	88	0.0352	1.30782		90	90
5	5	92	0.0368	1.13576		77.7832	77.7832
6	6	98	0.0392	1.12202		94.2067	94.2067
7	7	100	0.04	1.54158		61.7307	61.7307
8	8	122	0.0488	1.78274		90	90
9	9	148	0.0592	1.65718		81.3999	81.3999
10	10	150	0.06	1.91847		103.169	103.169
11	11	152	0.0608	2.17975		-175.148	4.85237
12	12	172	0.0688	1.81651		93.7834	93.7834
13	13	172	0.0688	1.87803		90	90	Shifted
14	14	232	0.0928	2.49556		62.4187	62.4187	62.4187
15	15	266	0.1064	3.76331		-179.451	0.549176	0.549176
16	16	270	0.108	3.33476		-172.291	7.7093	7.7093
17	17	300	0.12	2.7759		69.9337	69.9337	69.9337
18	18	328	0.1312	2.77515		61.9912	61.9912	61.9912
19	19	349	0.1396	3.75497		174.54	174.54	-5.46016
20	20	349	0.1396	3.05053		95.7962	95.7962	-84.2038
21	21	358	0.1432	2.67407		94.2635	94.2635	-85.7365
22	22	447	0.1788	5.17676		178.999	178.999	-1.00128
23	23	449	0.1796	4.95845		-159.728	20.2716	20.2716
24	24	491	0.1964	5.05112		-170.497	9.503	9.503
25	25	580	0.232	6.02996		-174.872	5.1282	5.1282
26	26	640	0.256	5.40496		-178.227	1.77306	1.77306
27	27	641	0.2564	6.1851		-177.897	2.10285	2.10285
28	28	707	0.2828	4.45516		64.4531	64.4531	64.4531
29	29	880	0.352	11.0842		-179.909	0.0910509	0.0910509
30	30	881	0.3524	6.1316		163.288	163.288	-16.7117
31	31	904	0.3616	9.07837		179.074	179.074	-0.92637
32	32	913	0.3652	7.61766		-174.855	5.14462	5.14462													Median:	22.0595				Average:		15.4655
33	33	923	0.3692	9.87692		-179.254	0.745806	0.745806																		Std. Dev:		15.368
34	34	971	0.3884	7.57939		-151.969	28.031	28.031
35	35	1036	0.4144	8.28366		-163.515	16.4849	16.4849							Row Labels	Count of 62.41866703			Angle	Count	Count					x	Normal Distribution
36	36	1117	0.4468	7.81401		177.975	177.975	-2.02489							-90--80	2			-90--80	2	2					-90	1.53987e-12
37	37	1243	0.4972	10.4041		-177.414	2.58551	2.58551							-20--10	1			-80--70							-88	3.72974e-12
38	38	1243	0.4972	9.83466		-162.904	17.0959	17.0959							-10-0	14			-70--60							-86	8.88216e-12
39	39	1256	0.5024	11.3484		-165.074	14.9262	14.9262							0-10	20			-60--50							-84	2.07971e-11
40	40	1310	0.524	9.47405		-177.093	2.90687	2.90687							10-20	18			-50--40							-82	4.78776e-11
41	41	1399	0.5596	13.5695		-171.387	8.61303	8.61303							20-30	23			-40--30							-80	1.08369e-10
42	42	1521	0.6084	13.6967		-164.331	15.6688	15.6688							30-40	5			-30--20							-78	2.41171e-10
43	43	1533	0.6132	8.00599		-157.011	22.9891	22.9891							40-50	2			-20--10	1	1					-76	5.277e-10
44	44	1557	0.6228	9.72946		-154.582	25.4181	25.4181							60-70	3			-10-0	14	14					-74	1.13526e-09
45	45	1667	0.6668	14.0217		-159.214	20.7863	20.7863							70-80	1			0-10	20	20					-72	2.4013e-09
46	46	1683	0.6732	9.21637		-172.706	7.29416	7.29416							Grand Total	89			10-20	18	18					-70	4.99393e-09
47	47	1770	0.708	11.0201		-162.197	17.8031	17.8031											20-30	23	23					-68	1.02114e-08
48	48	1910	0.764	8.59881		179.908	179.908	-0.0920444											30-40	5	5					-66	2.05291e-08
49	49	2067	0.8268	12.2597		-156.56	23.4396	23.4396											40-50	2	2					-64	4.05788e-08
50	50	2131	0.8524	12.1265		-172.412	7.58753	7.58753											60-70	3	3					-62	7.88631e-08
51	51	2199	0.8796	12.9385		-152.822	27.178	27.178											70-80	1	1					-60	1.50693e-07
52	52	2309	0.9236	17.5809		-161.81	18.19	18.19																		-58	2.83111e-07
53	53	2462	0.9848	18.3119		170.003	170.003	-9.99663																		-56	5.22956e-07
54	54	2478	0.9912	10.1645		-137.103	42.8974	42.8974																		-54	9.49769e-07
55	55	2501	1.0004	14.8904		-154.574	25.4258	25.4258																		-52	1.69596e-06
56	56	2683	1.0732	16.6722		179.994	179.994	-0.00556856																		-50	2.97754e-06
57	57	2686	1.0744	16.9312		-156.774	23.2262	23.2262																		-48	5.13977e-06
58	58	3056	1.2224	17.8252		-173.177	6.82347	6.82347																		-46	8.72318e-06
59	59	3251	1.3004	16.2892		-158.266	21.7337	21.7337																		-44	1.45563e-05
60	60	3508	1.4032	14.3681		-156.965	23.0351	23.0351																		-42	2.3882e-05
61	61	3730	1.492	25.5549		-165.056	14.9444	14.9444																		-40	3.85243e-05
62	62	4058	1.6232	28.102		-172.025	7.97524	7.97524																		-38	6.11004e-05
63	63	4700	1.88	17.0621		178.747	178.747	-1.25291																		-36	9.52791e-05
64	64	4772	1.9088	27.3107		173.564	173.564	-6.43636																		-34	0.000146082
65	65	4877	1.9508	23.8857		179.356	179.356	-0.644344																		-32	0.000220211
66	66	5079	2.0316	20.256		-142.15	37.8501	37.8501																		-30	0.000326382
67	67	5538	2.2152	17.7418		-144.57	35.43	35.43																		-28	0.000475618
68	68	5894	2.3576	28.6223		172.506	172.506	-7.49379																		-26	0.000681451
69	69	5997	2.3988	34.1289		-166.135	13.8651	13.8651																		-24	0.000959965
70	70	6230	2.492	46.7284		176.886	176.886	-3.11412																		-22	0.0013296
71	71	6262	2.5048	29.6301		179.728	179.728	-0.272399																		-20	0.00181064
72	72	6566	2.6264	30.7382		-159.971	20.029	20.029																		-18	0.0024243
73	73	6761	2.7044	28.2308		-172.593	7.40709	7.40709																		-16	0.00319143
74	74	7494	2.9976	40.609		-169.488	10.5116	10.5116																		-14	0.00413075
75	75	7869	3.1476	25.3149		-139.858	40.1421	40.1421																		-12	0.00525675
76	76	8129	3.2516	32.7353		-152.727	27.2735	27.2735																		-10	0.00657733
77	77	8603	3.4412	26.4174		-151.736	28.2644	28.2644																		-8	0.00809146
78	78	8819	3.5276	49.9344		-169.508	10.4924	10.4924																		-6	0.00978699
79	79	9694	3.8776	48.9651		176.776	176.776	-3.22397																		-4	0.011639
80	80	9752	3.9008	65.2847		-159.748	20.2524	20.2524																		-2	0.013609
81	81	10343	4.1372	38.809		-145.459	34.5406	34.5406																		0	0.0156452
82	82	10928	4.3712	38.9554		-153.492	26.5085	26.5085																		2	0.0176841
83	83	11045	4.418	55.1899		-168.499	11.5014	11.5014																		4	0.0196529
84	84	11082	4.4328	42.2531		-178.457	1.54265	1.54265																		6	0.0214741
85	85	12621	5.0484	40.5559		-146.737	33.2629	33.2629																		8	0.0230701
86	86	16970	6.788	56.996		-154.312	25.6877	25.6877																		10	0.0243684
87	87	17525	7.01	72.0519		-163.326	16.6745	16.6745																		12	0.0253076
88	88	18635	7.454	53.096		77.2293	77.2293	77.2293																		14	0.0258415
89	89	19384	7.7536	69.047		-156.584	23.4157	23.4157																		16	0.0259436
90	90	19592	7.8368	73.7559		-158.93	21.07	21.07																		18	0.0256086
91	91	19929	7.9716	82.6945		-161.671	18.329	18.329																		20	0.0248535
92	92	22414	8.9656	81.468		-167.127	12.8734	12.8734																		22	0.0237155
93	93	23093	9.2372	76.0051		-158.846	21.1542	21.1542																		24	0.0222496
94	94	23253	9.3012	89.0538		-155.778	24.2224	24.2224																		26	0.0205238
95	95	23482	9.3928	85.6022		-173.206	6.79387	6.79387																		28	0.0186139
96	96	25667	10.2668	88.94		-172.051	7.94937	7.94937																		30	0.0165982
97	97	28349	11.3396	78.5844		-161.96	18.0402	18.0402																		32	0.0145522
98	98	32785	13.114	81.444		-162.107	17.8926	17.8926																		34	0.0125442
99	99	34000	13.6	104.783		-157.615	22.3854	22.3854																		36	0.0106316
100	100	36035	14.414	143.242		-152.785	27.2146	27.2146																		38	0.00885933
101	101	36218	14.4872	105.745		-166.501	13.4991	13.4991																		40	0.00725851
102	102	40414	16.1656	107.959		-142.747	37.2534	37.2534																		42	0.00584707
103	103	59492	23.7968	215.934		-161.465	18.5349	18.5349																		44	0.00463099
																										46	0.00360623
																										48	0.00276108
																										50	0.00207849
																										52	0.00153837
																										54	0.00111949
																										56	0.000800982
																										58	0.000563469
																										60	0.000389728
																										62	0.000265032
																										64	0.000177206
																										66	0.000116494
																										68	7.52965e-05
																										70	4.78508e-05
																										72	2.98985e-05
																										74	1.83676e-05
																										76	1.10943e-05
																										78	6.58861e-06
																										80	3.84708e-06
